# Supplementary material for: A highly-flexible cyclic-decavanadate ligand for interconversion of dinuclear- and trinuclear-cobalt(ii) and manganese(ii) cores
Source: Royal Society of Chemistry journal article supplement (doi:10.1039/c7ra05941h), 2017-01-01
Supplement: c7ra05941h1.pdf [file c7ra05941h1.pdf]

*Supporting Information for*

## **A Highly-flexible Cyclic-decavanadate Ligand for Interconversion of Dinuclear- and Trinuclear-cobalt(II) and Manganese(II) Cores**

Tatsuya Maruyama,<sup>a</sup> Yuji Kikukawa,<sup>a,b</sup> Hiroshi Sakiyama,<sup>c</sup> Misaki Katayama,<sup>d</sup> Yasuhiro Inada,<sup>d</sup> and Yoshihito Hayashi<sup>a\*</sup>

<sup>a</sup>Department of Chemistry, Graduate School of Natural Science and Technology, Kanazawa University, Kakuma, Kanazawa 920-1192, Ishikawa, Japan.

<sup>b</sup>Japan Science and Technology Agency (JST), PRESTO, 4-1-8 Honcho, Kawaguchi 332-0012, Saitama, Japan.

<sup>c</sup>Department of Science, Faculty of Science, Yamagata University, Kojirakawa, Yamagata 990-8560, Japan.

<sup>d</sup>Department of Applied Chemistry, Graduate School of Life Sciences, Ritsumeikan University, 1-1-1 Noji-Higashi, Kusatsu 525-8577, Japan.

### **Contents**

Table S1. Crystallographic Data for **Co3**.

Table S2. Selected Bond Lengths (Å) and Angles (deg) for **Co3** and the Reported Isostructural Trimanganese Containing Polyoxovanadate (**Mn3**).

Table S3. EXAFS fit parameters for **Mn2** and **Mn3**.

Figure S1. IR spectra of (a) **Co2**, (b) **Co3**, (c) **Mn2**, and (d) **Mn3**. Solid line: ATR method. Dotted line: Nujol-mull method.

Figure S2. Mn K-edge EXAFS oscillations of **Mn2** (a) in BN pellets and (b) in propylene carbonate, and **Mn3** (c) in BN pellets and (d) in propylene carbonate.

**Table S1.** Crystallographic Data for **Co3**

|                                          | <b>Co3</b>                                                                                      | <b>Mn3<sup>41</sup></b>                                                                         |
|------------------------------------------|-------------------------------------------------------------------------------------------------|-------------------------------------------------------------------------------------------------|
| formula                                  | C <sub>48</sub> H <sub>114</sub> Co <sub>3</sub> N <sub>8</sub> O <sub>33</sub> V <sub>10</sub> | C <sub>48</sub> H <sub>114</sub> Mn <sub>3</sub> N <sub>8</sub> O <sub>33</sub> V <sub>10</sub> |
| fw                                       | 2017.66                                                                                         | 2005.69                                                                                         |
| crystal system                           | monoclinic                                                                                      | monoclinic                                                                                      |
| space group                              | <i>P</i> 2 <sub>1</sub> / <i>n</i> (No. 14)                                                     | <i>P</i> 2 <sub>1</sub> / <i>n</i> (No. 14)                                                     |
| <i>a</i> (Å)                             | 15.8703(9)                                                                                      | 15.9731(14)                                                                                     |
| <i>b</i> (Å)                             | 26.0327(14)                                                                                     | 26.127(2)                                                                                       |
| <i>c</i> (Å)                             | 19.7604(11)                                                                                     | 19.7628(17)                                                                                     |
| $\alpha$ (deg)                           | 90                                                                                              | 90                                                                                              |
| $\beta$ (deg)                            | 92.1531(18)                                                                                     | 91.538(2)                                                                                       |
| $\gamma$ (deg)                           | 90                                                                                              | 90                                                                                              |
| <i>V</i> / (Å <sup>3</sup> )             | 8158.2(8)                                                                                       | 8244.5(13)                                                                                      |
| <i>Z</i>                                 | 4                                                                                               | 4                                                                                               |
| temp. (K)                                | 83(2)                                                                                           | 83(2)                                                                                           |
| GOF                                      | 1.084                                                                                           | 1.150                                                                                           |
| <i>R</i> 1 [ <i>I</i> > 2σ( <i>I</i> )]  | 0.0398                                                                                          | 0.0550                                                                                          |
| <i>wR</i> 2 [ <i>I</i> > 2σ( <i>I</i> )] | 0.1036                                                                                          | 0.1358                                                                                          |

$$R1 = \sum ||F_o| - |F_c| / \sum |F_o|. \quad wR2 = \{ \sum [w(F_o^2 - F_c^2)] / \sum [w(F_o^2)^2] \}^{1/2}.$$

**Table S2.** Selected Bond Lengths (Å) and Angles (deg) for **Co3** and the Reported Isostructural Trimanganese Containing Polyoxovanadate (**Mn3**)<sup>41</sup>

| [M <sub>3</sub> (OAc)(H <sub>2</sub> O)V <sub>10</sub> O <sub>30</sub> ] <sup>5-</sup> |                     |                     |
|----------------------------------------------------------------------------------------|---------------------|---------------------|
|                                                                                        | <b>Co3</b> (M = Co) | <b>Mn3</b> (M = Mn) |
| Bond Length (Å)                                                                        |                     |                     |
| M1···M2                                                                                | 3.2734(6)           | 3.4499(7)           |
| M1···M3                                                                                | 3.3194(5)           | 3.4866(7)           |
| M2···M3                                                                                | 3.0035(7)           | 3.1349(7)           |
| M1–O                                                                                   | 2.049(2)–2.174(2)   | 2.110(2)–2.272(2)   |
| M2–O                                                                                   | 2.027(2)–2.167(2)   | 2.095(2)–2.257(2)   |
| M3–O                                                                                   | 2.000(2)–2.214(2)   | 2.069(2)–2.351(2)   |
| Bond Angle (deg)                                                                       |                     |                     |
| M1–O10–M2                                                                              | 99.97(7)            | 101.08(9)           |
| M1–O19–M2                                                                              | 97.86(6)            | 99.23(9)            |
| M2–O4–M3                                                                               | 92.66(7)            | 93.21(9)            |
| M2–O19–M3                                                                              | 87.36(6)            | 88.22(8)            |
| M3–O19–M1                                                                              | 99.29(7)            | 101.00(9)           |
| M3–O31–M1                                                                              | 100.99(7)           | 101.31(9)           |

**Table S3.** EXAFS fit parameters for **Mn2** and **Mn3**

|                     | EXAFS (solid)      |                           |                                          | EXAFS (solution)   |                           |                                          |
|---------------------|--------------------|---------------------------|------------------------------------------|--------------------|---------------------------|------------------------------------------|
|                     | CN <sup>a</sup>    | <i>r</i> <sup>b</sup> / Å | $\sigma^2$ <sup>c</sup> / Å <sup>2</sup> | CN <sup>a</sup>    | <i>r</i> <sup>b</sup> / Å | $\sigma^2$ <sup>c</sup> / Å <sup>2</sup> |
| <b>Compound Mn2</b> |                    |                           |                                          |                    |                           |                                          |
| Mn–O                | 6 <sup>d</sup>     | 2.16(1)                   | 0.008(1)                                 | 4.6(9)             | 2.15(1)                   | 0.006(2)                                 |
| Mn···Mn             | 1 <sup>d</sup>     | 3.2(1)                    | 0.018(4)                                 | 1 <sup>d</sup>     | 3.20(9)                   | 0.013(3)                                 |
| Mn···V              | 6 <sup>d</sup>     | 3.45(7)                   | 0.018(4) <sup>e</sup>                    | 4.6 <sup>f</sup>   | 3.50(4)                   | 0.013(3) <sup>e</sup>                    |
| <b>Compound Mn3</b> |                    |                           |                                          |                    |                           |                                          |
| Mn–O                | 3 <sup>d</sup>     | 2.07(3)                   | 0.001(1)                                 | 3(2)               | 2.05(8)                   | 0.01(1)                                  |
| Mn–O                | 3 <sup>d</sup>     | 2.22(3)                   | 0.001(5)                                 | 3(2) <sup>f</sup>  | 2.20(7)                   | 0.01(2)                                  |
| Mn···Mn             | 0.667 <sup>d</sup> | 3.1(2)                    | 0.01(4)                                  | 0.667 <sup>e</sup> | 3.1(1)                    | 0.005(6)                                 |
| Mn···Mn             | 1.333 <sup>d</sup> | 3.4(2) <sup>g</sup>       | 0.01(4) <sup>h</sup>                     | 1.333 <sup>d</sup> | 3.4(1) <sup>g</sup>       | 0.005(6) <sup>h</sup>                    |
| Mn···V              | 4 <sup>d</sup>     | 3.4(4)                    | 0.01(1)                                  | 4.36 <sup>i</sup>  | 3.5(8)                    | 0.01(1)                                  |

<sup>a</sup>Coordination number. <sup>b</sup>Distances between Mn and O, Mn, and V. <sup>c</sup>Debye-Waller factor. <sup>d</sup>The coordination numbers are fixed according to the values from single X-ray study. <sup>e</sup>The Debye-Waller factor was kept equal to that of the Mn–Mn. <sup>f</sup>The CN was kept equal to that of the Mn–O. <sup>g</sup> $\Delta r$  was kept equal to that of another Mn–Mn. <sup>h</sup>The Debye-Waller factor was kept equal to that of another Mn–Mn. <sup>i</sup>The CN was fixed to four-thirds of CN of Mn–O.

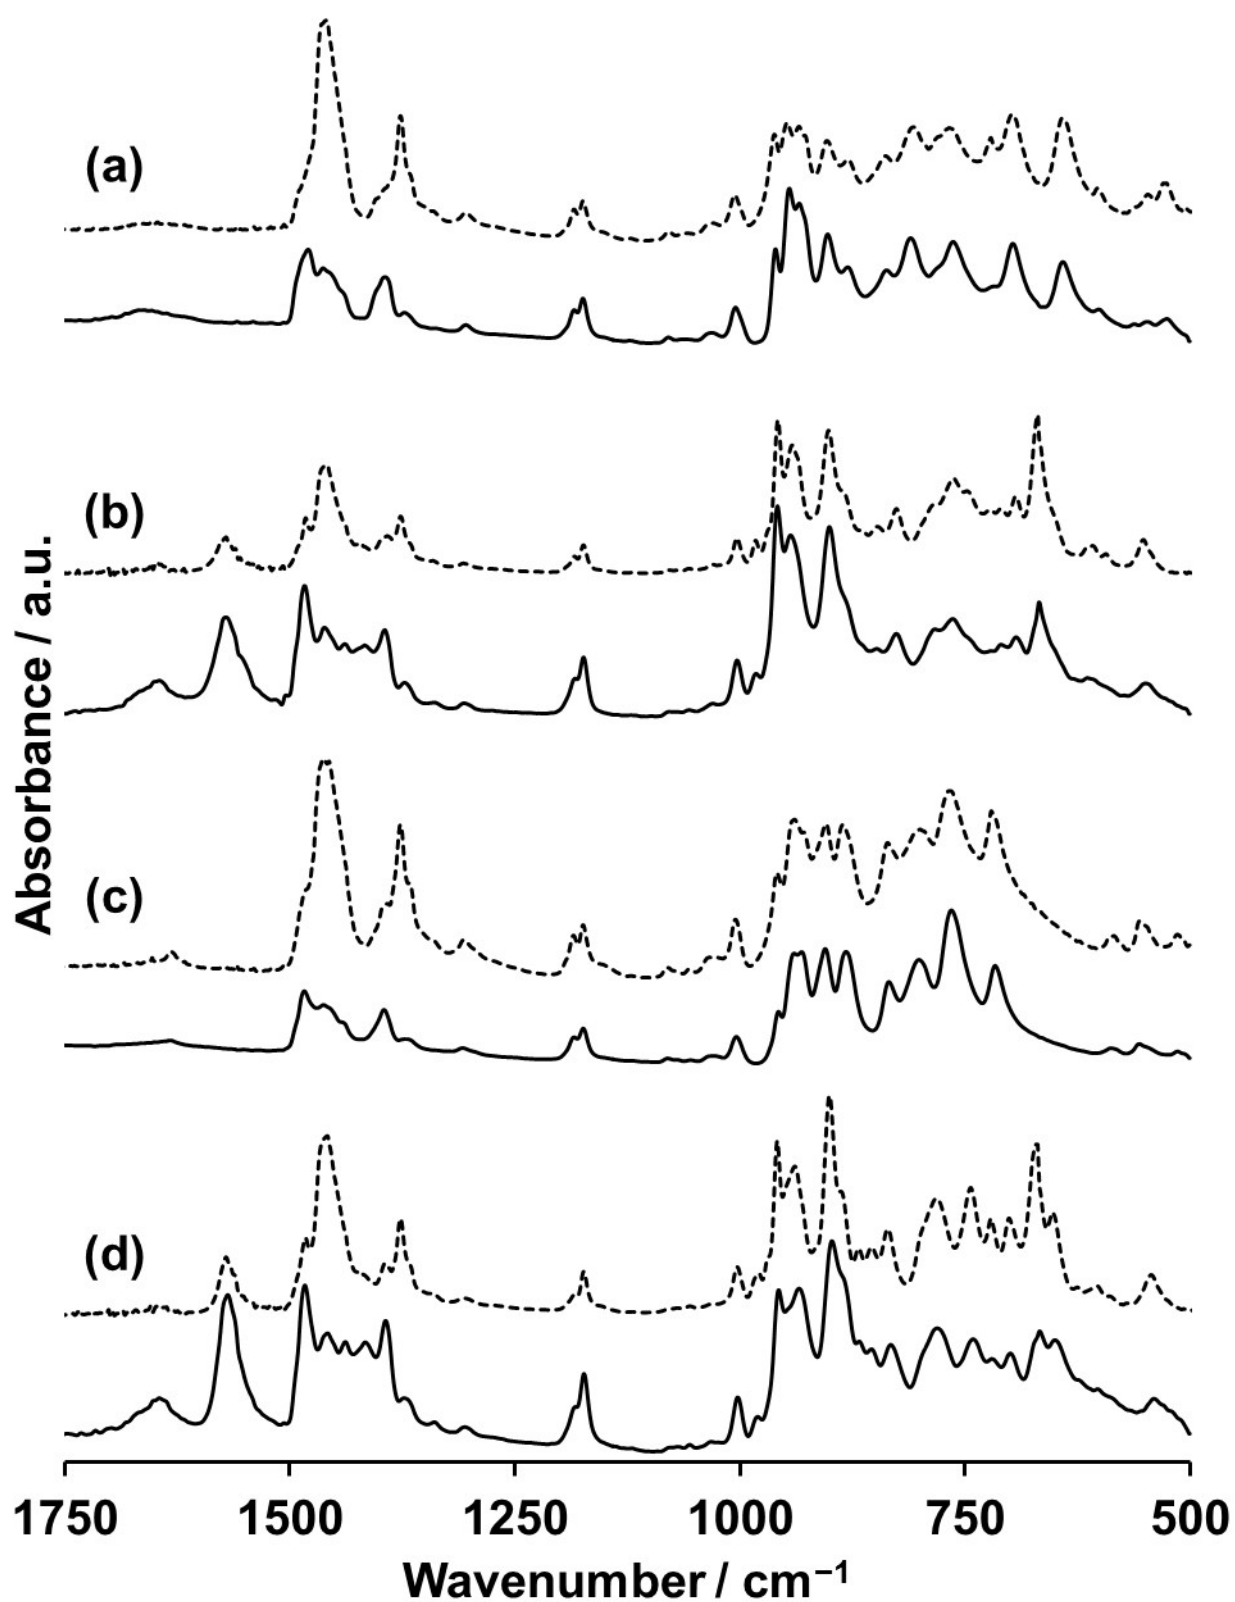

**Figure S1.** IR spectra of (a) Co<sub>2</sub>, (b) Co<sub>3</sub>, (c) Mn<sub>2</sub>, and (d) Mn<sub>3</sub>. Solid line: ATR method. Dotted line: Nujol-mull method.

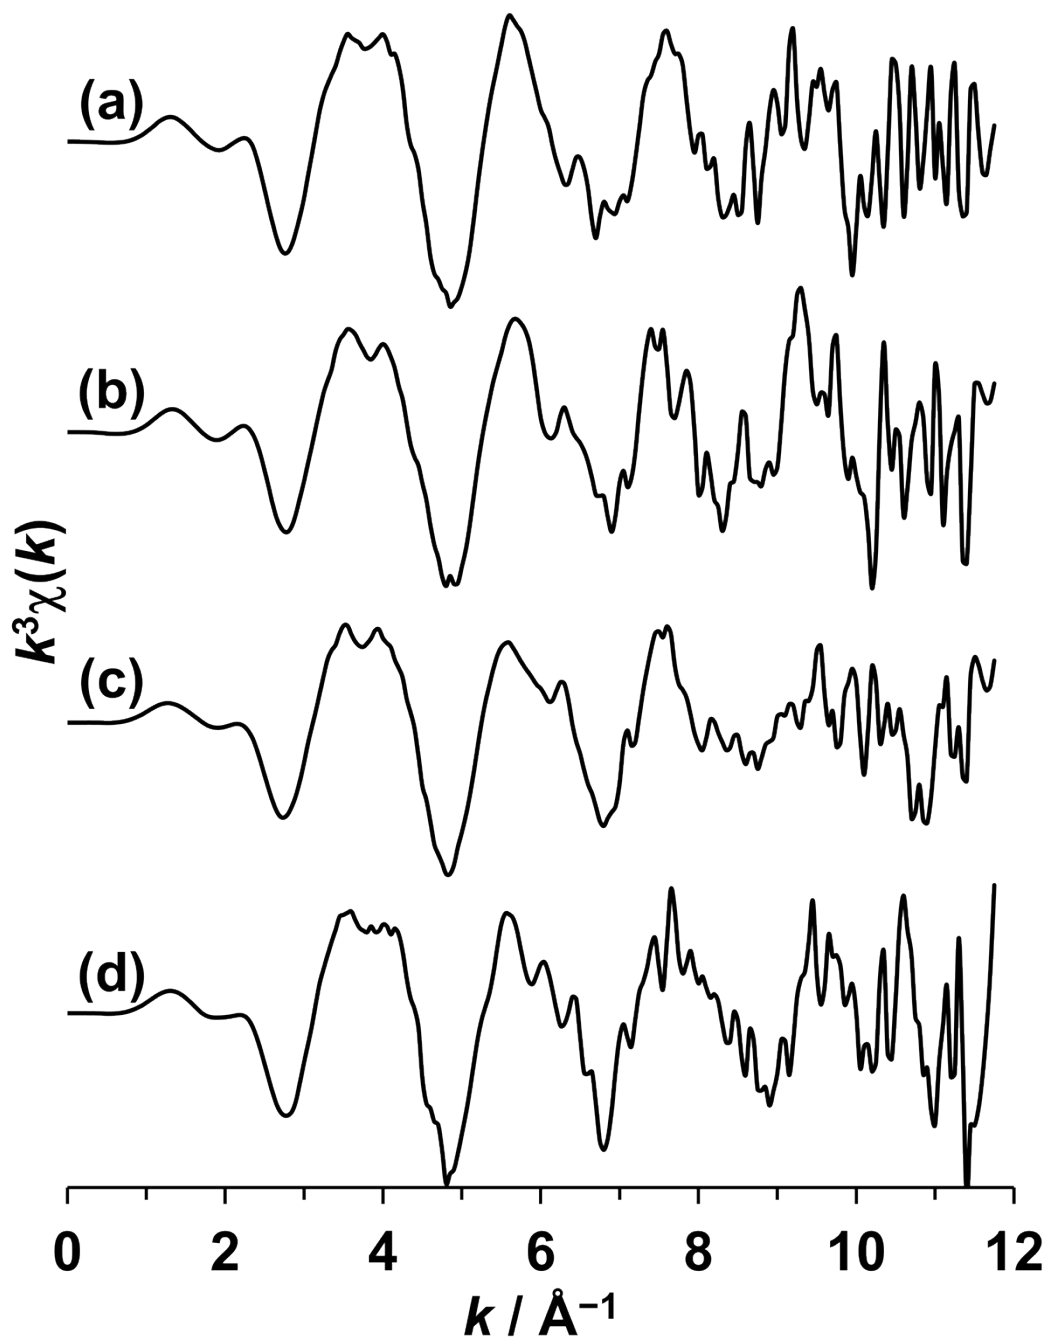

**Figure S2.** Mn K-edge EXAFS oscillations of **Mn2** (a) in BN pellets and (b) in propylene carbonate, and **Mn3** (c) in BN pellets and (d) in propylene carbonate.
